21 Test (RBPT) and competitive Enzyme Linked Immunosorbent Assay (c-ELISA), for screening  
22 and confirmation, respectively. A questionnaire survey was administered to participants collect  
23 epidemiological data.

## 24 **Results**

25 The overall seroprevalence among the high risk occupational individuals was 1.41% (95% CI:  
26 0.01-0.03). Seroprevalence among the different occupations were as follows: shepherds 1.33%  
27 (95% CI: 0.14-0.22); butcher men 5.26% (95% CI: 0.10-0.17) and abattoir workers 1.08%  
28 (95% CI: 0.39-0.49). Seroprevalence was noted to vary according to occupation type, milk  
29 consumption behaviour, age and sex. Butcher men recorded the highest seroprevalence (5.0%)  
30 while individuals who consumed unboiled milk had a higher seroprevalence (1.56%) compared  
31 to those who drunk boiled milk. High seropositivity (2.25%) was observed among the age  
32 group of 1-10 years while male individuals had a higher seroprevalence (1.41%) than females  
33 (0%). Butcher men were at higher risk of exposure compared to other professions.

## 34 **Conclusion**

35 Our findings show the presence of brucellosis in occupationally exposed individuals in Mbeya  
36 region. There is need to sensitize the exposed individuals in order to reduce the risk of acquiring  
37 *Brucella* infections from animals and animal products This also calls for public health  
38 awareness about the disease, and implementation of control measures that will prevent further  
39 spread of brucellosis within and outside the study area..

40

41 **Keywords:** Brucellosis, human, occupation, prevalence, risk factors.

42

## 43 **Author summary**

44 Brucellosis is a bacterial zoonosis that has evolved to establish itself as an occupational and  
45 food-borne disease Worldwide. It is responsible for huge economic losses incurred by livestock  
46 keepers and poses a public health risk to humans in most developing countries. In Tanzania,  
47 which has the 3<sup>rd</sup> highest cattle population in Africa, many studies that have been done show  
48 that brucellosis exists in livestock, especially in cattle and wildlife. However, very few studies  
49 have reported on human brucellosis. The disease has been reported to occur in humans who  
50 have direct exposure to cattle or cattle products like livestock farmers, abattoir workers,  
51 veterinarians, shepherds and farm workers in many developing countries. A few studies in  
52 Tanzania have reported seroprevalences among these high-risk occupations; however, the  
53 disease has not been fully described in Mbeya region. This study was therefore aimed at filling  
54 these information gaps and contributing to the existing body of knowledge.

## 55 **Introduction**

56 Brucellosis is a major zoonotic disease of public health and economic importance affecting  
57 domestic animals, wildlife and humans [1]. It is the second most important zoonotic disease in  
58 the world after Rabies [2]. Brucellosis is distributed worldwide but is common in countries that  
59 do not have good standardized and effective public health and domestic animal health  
60 programmes [3]. Although the genus *Brucella* consists of twelve species, it is noteworthy that  
61 this list may change as other species continue to be discovered [4]. Among the *Brucella* species,  
62 zoonotic infections are mainly attributed to *B. melitensis*, *B. abortus*, and *B. suis* [5], while *B.*  
63 *canis* has been mainly reported as an occupational hazard to veterinarians and laboratory  
64 workers [6]. Human brucellosis is a highly debilitating infection that presents as an acute febrile  
65 flu-like illness [7]. It is characterized by symptoms such as fever, anorexia, fatigue, headaches,

66 depression and weight loss that may easily be confused with malaria or typhoid [7]. The source  
67 of human infection always resides in domestic or wild reservoirs.

68 Human cases continue to occur because of the traditional use of raw milk products and  
69 following close contact with infected animals [8, 9]. It has been observed that most cases of  
70 human brucellosis occur in rural areas where half of the people live in close proximity to their  
71 livestock, consume raw milk and make cheese using unhygienic methods [7]. Although few  
72 reports on human brucellosis exist, documentation of human cases of brucellosis in Sub-  
73 Saharan Africa is scarce, particularly reports relating to isolation of the causative agents. In  
74 sub-Saharan Africa, the prevalence of human brucellosis has been reported with varying  
75 seroprevalence ranging from 0.02% to 31.8% [10, 11, 12, 13, 14]. In Tanzania, several studies  
76 have been done in different regions including Katavi, Manyara, Morogoro, Northern Tanzania  
77 and Mwanza which have reported human brucellosis at seroprevalence ranging from 0.6 to  
78 48.4% [15,16, 17, 18,19, 20,21]. However, there is no previous report on the disease among  
79 the high-risk human population in Mbeya region. Therefore, this study was aimed at  
80 establishing the seroprevalence and associated risk factors of human brucellosis among high-  
81 risk occupations in Mbeya region, Tanzania.

82

## 83 **Materials and methods**

### 84 **Study area**

85 The study was carried out in Mbeya Region in the Southern highlands of Tanzania between  
86 November 2015 and January 2016 in three selected districts namely; Mbarari, Mbeya and  
87 Momba. Geographically, Mbeya region lies about 5500 feet above sea level and experiences

88 subtropical highland climate with humid summers and dry winters. The temperature ranges  
89 between -6°C in the highlands and 29°C on the lowlands, while the average rainfall is 900mm  
90 per year. Details of the study area have been described in our earlier publication [22].  
91 According to the 2012 national census, the region has an estimated human population of about  
92 2,707,[23] among which 1, 297,738 are males and 1, 409, 672 are females. A majority of the  
93 population (1, 809,298) dwell in the rural areas whereas 898, 112 are found in urban areas.

#### 94 **Study population**

95 The study population consisted of all individuals above 18 years that were involved in the cattle  
96 value chain. They were grouped into six categories; livestock professionals, shepherds, butcher  
97 men, abattoir workers, milk vendors and consumers of animal products. Sampling priority was  
98 given to individuals with direct contact/exposure to animals.

#### 99 **Study design and sample size calculation**

100 This was a cross-sectional study that was strategically designed in order to determine the  
101 seroprevalence of human brucellosis in high-risk individuals. A total of 425 humans  
102 comprising 75 shepherds from 37 *Brucella* positive herds, 11 livestock professionals, 57  
103 butcher men, 186 abattoir workers from 4 abattoirs, 72 persons engaged in cattle milking and  
104 24 animal product consumers were recruited in the study. The numbers of shepherds to be  
105 sampled were pre-determined from known *Brucella* positive herds based on our earlier study  
106 [22]. Among the households with infected cattle herds, only 37 were enrolled out of 53 herds.  
107 The selected study region encompassed a strategic population of individuals whose culture  
108 encourages the use of animal products for proteins, thus predisposing them to zoonotic  
109 diseases.

#### 110 **Data collection**

111 A phlebotomist aseptically collected 5ml of blood from the participant's brachial vein using a  
112 sterile disposable syringe into pre labelled plain vacutainer tubes. The samples were then  
113 incubated overnight at room temperature and centrifuged at 3000 xg to get clear serum. All  
114 collected samples were assigned identification numbers and stored in a mobile refrigerator until  
115 shipment to the University of Zambia laboratory where they were stored in at -20 degree until  
116 they were examined for *Brucella* antibodies.

117 A pre-tested structured questionnaire was administered to the participants from whom blood  
118 was drawn in order to collect information on demographic data, socioeconomic data, exposure  
119 to animals and animal products, consumption of dairy and animal source products and the  
120 presence of specific symptoms like fever, headaches, sweats, sleeping difficulties, fatigue,  
121 weight loss, joint pain, muscle pain and back pain.

122

## 123 **Serological testing**

### 124 **Rose Bengal plate test**

125 All collected sera samples were screened using Rose Bengal Plate Test (RBPT), antigen  
126 manufactured by Ubio Biotechnology Systems Pvt Ltd for detection of *Brucella* antibodies  
127 according to the test procedure recommended by OIE [1]. Briefly, 20µl of RBPT antigen and  
128 20µl of the test serum were placed alongside on one well of the glass plate and mixed  
129 thoroughly. The slide was gently rocked for 4 minutes and thereafter, any visible agglutination  
130 was considered as a presumptive positive result.

### 131 **Competitive Enzyme-Linked Immunosorbent Assay (C-ELISA)**

132 RBPT positive sera were then subjected to competitive Enzyme-Linked Immunosorbent Assay  
133 (c-ELISA) as a confirmatory test, adopting a test procedure and interpretation of results as  
134 recommended by the manufacturer (Svanova Biotech AB SE-751 Uppsala, Sweden) and  
135 described by [24].

136 According to the ELISA kit manufacturer, serum was regarded as positive if the PI value was  
137  $\geq 30\%$ . Only individuals that tested positive to both RBPT and c-ELISA were regarded as  
138 *Brucella* seropositive.

### 139 **Data management and analysis**

140 Data obtained from the serological tests and a questionnaire survey was stored in an Excel®  
141 spreadsheet database before being imported into STATA 13® statistical software for analysis.  
142 Categorical variables were summarized as frequency and percentages; continuous variables  
143 were summarized as mean or standard deviation (SD). P-values of 0.05 or less were considered  
144 statistically significant. A person was considered to be seropositive when tested positive to  
145 both RBPT and c-ELISA. The degree of association between each risk factor was assessed  
146 using the chi-square test and for all analysis, a p-value of  $\leq 0.05$  was taken as significant.

### 147 **Ethical consideration**

148 Ethical approval (reference number NIMR/HQ/R.8a/Vol.1X/2050) was obtained from the  
149 Medical Research Committee of the United Republic of Tanzania prior to the study. Individual  
150 written consent was obtained from guardians for individuals that were less than 18 years prior  
151 to enrolment. Informed consent was obtained from all participants using written and verbal  
152 explanation of the study purpose and procedure using the Swahili language.

153

## 154 Results

155 A total of 425 individuals working in the cattle value chain in Tanzania were included in the  
156 study (Table 1). The overall human brucellosis prevalence was 1.41% (95% CI: 1.7-2.6). No  
157 female participant (n=334) tested positive for brucellosis even though these were in the  
158 majority compared to males (n=91). *Brucella* seroprevalence was recorded in three  
159 occupational categories out of the six that were considered in our study (Table 2). It was also  
160 observed that 75.3% of respondents (n=320) consumed raw milk and only 24.7% (n=10)  
161 consumed boiled milk and none had a history of consuming pasteurized milk (Table 2). The  
162 predictor variables were assessed for collinearity using Pearson's Chi-square test and revealed  
163 a strong association between the occupation of an individual and his/her sex (P-value= $\leq$ .0001)  
164 and age category (P-value= $\leq$ .0001).

165 **Table 1: Human blood sample distribution by study district and occupation in Mbeya**  
166 **Region**

| District     | Shepherd  | Livestock<br>Professional | Milking<br>personnel | Abattoir<br>worker | Butcher<br>men | Animal<br>product<br>consumer | <b>Total</b> |
|--------------|-----------|---------------------------|----------------------|--------------------|----------------|-------------------------------|--------------|
| Mbarari      | 45        | 7                         | 64                   | 50                 | 30             | 24                            | <b>220</b>   |
| Momba        | 22        | 1                         | 0                    | 9                  | 13             | 0                             | <b>45</b>    |
| Mbeya        | 8         | 3                         | 8                    | 127                | 14             | 0                             | <b>160</b>   |
| <b>Total</b> | <b>75</b> | <b>11</b>                 | <b>72</b>            | <b>186</b>         | <b>57</b>      | <b>24</b>                     | <b>425</b>   |

167

## 168 Seroprevalence of human brucellosis

169 There was no statistical association between *Brucella* seropositivity and all the hypothesized  
 170 risk factors evaluated in univariate analysis (Table 2). However, results indicated an apparent  
 171 variation of seroprevalence by occupation, milk consumption behavior, age and sex. Butcher  
 172 men recorded the highest seroprevalence (5.0%) while a higher seroprevalence (1.56%) was  
 173 recorded among individuals who consumed unboiled milk compared to drinkers of boiled milk  
 174 (Table 2). High seropositivity (2.25%) was observed among the age group of 1-10 years while  
 175 male individuals had a higher seroprevalence (1.41%) than females (0%) as shown in Table  
 176 02.

177 **Table 2: Results of univariate analysis of seroprevalence of human brucellosis by different**  
 178 **variables**

| Variable   | Level     | No  | Distribution | Prop.<br>positive<br>(%) | 95% CI    | P-value |
|------------|-----------|-----|--------------|--------------------------|-----------|---------|
| Sex        | Male      | 91  | 21.4         | 1.41                     | 0.18-0.26 | 0.19    |
|            | Female    | 334 | 78.6         | 0.00                     | 0.74-0.82 |         |
| Area       | Mbarari   | 220 | 51.8         | 1.36                     | 0.47-0.57 | 0.64    |
|            | Momba     | 45  | 10.6         | 0.00                     | 0.08-0.14 |         |
|            | Mbeya     | 160 | 37.6         | 1.88                     | 0.33-0.42 |         |
| Age        | 1-10 yrs  | 159 | 37.4         | 2.25                     | 0.33-0.42 | 0.27    |
|            | 11-20 yrs | 196 | 46.1         | 1.02                     | 0.41-0.51 |         |
|            | 21-30 yrs | 65  | 15.3         | 0.00                     | 0.12-0.20 |         |
|            | 31-40 yrs | 5   | 0.1          | 0.00                     | 0.00-0.03 |         |
| Occupation | Shepherd  | 75  | 17.6         | 1.33                     | 0.14-0.22 | 0.17    |

|                       |                        |     |      |      |           |      |
|-----------------------|------------------------|-----|------|------|-----------|------|
|                       | Livestock officer      | 11  | 2.5  | 0.00 | 0.01-0.05 |      |
|                       | Butcher men            | 57  | 13.4 | 5.26 | 0.10-0.17 |      |
|                       | Abattoir worker        | 186 | 43.7 | 1.08 | 0.39-0.49 |      |
|                       | Milking Animal product | 72  | 17.0 | 0.00 | 0.14-0.21 |      |
|                       | Animal product         | 24  | 5.6  | 0.00 | 0.04-0.08 |      |
| Source of milk        | Cattle                 | 425 | 1    | 1.41 | -         | -    |
|                       | Goat                   | 0   | -    | 0.00 |           |      |
| Milk consumption      | Unboiled               | 320 | 75.3 | 1.56 | 0.71-0.79 | 0.65 |
|                       | Boiled                 | 105 | 24.7 | 0.95 | 0.21-0.29 |      |
| Consuming raw blood   | No                     | 425 | 1    | 1.41 | -         | -    |
|                       | Yes                    | 0   |      |      |           |      |
| Assisting parturition | No                     | 312 | 73.4 | 1.60 | 0.69-0.77 | 0.58 |
|                       | Yes                    | 113 | 26.6 | 0.88 | 0.23-0.31 |      |

179

180

181 **Discussion**

182 Brucellosis is among the diseases categorized as a neglected zoonosis by the WHO. This is so  
183 because, despite its wide distribution and potentially harmful effect on human health, it has not  
184 been given due attention compared to other diseases. Generally, the public health importance  
185 of brucellosis is acknowledged throughout the world; however people in certain occupations  
186 or settings still face increased risk of exposure to the *Brucella* pathogen. These may include  
187 many players in the livestock value chain starting from livestock keepers,  
188 veterinarians/livestock officers, animal handlers, laboratory workers, slaughterhouse workers,  
189 butcher-men and consumers of animal products (meat, milk, geese).

190 The aim of this study was to estimate the seroprevalence of human brucellosis and identify  
191 associated risk factors among individuals engaged in risky professions in Mbeya Region. The  
192 study found an overall seroprevalence of 1.41% among shepherds, butcher men and abattoir  
193 workers in Mbeya region. This seropositivity is lower than the 2.2% reported [1] in the  
194 Kilimanjaro region and the 48.4% reported by [20] in Mwanza region. The difference can be  
195 attributed to differences in geographical locations and the use of a single but highly sensitive  
196 test (Rapid agglutination test) in the previous study. In other parts of Africa, brucellosis studies  
197 among high risk occupations in Ghana and Nigeria in slaughterhouses found seroprevalences  
198 of 9.6% [25] and 24.1% [11] while a study in Sudan found varying prevalences of 9.5%, 15.3%,  
199 24.4% and 26.5% among veterinarians, meat inspectors, abattoir workers and animal handlers,  
200 respectively [26]. The findings in Ghana, Nigeria and Sudan were higher than those found in  
201 this study in all occupational groups. These result does not justify the lower levels of human  
202 brucellosis in our study area as most of the people had a tendency of taking antibiotics regularly  
203 [27]. In so doing, they could treat brucellosis unknowingly and thereby negatively cause the  
204 existing problem of antimicrobial drug resistance. Brucellosis has also been reported in  
205 slaughterhouse workers in Iran with the prevalence of 7.8% [28] and 9.8% [9]. In Lahore

206 district of Pakistan, the prevalence of brucellosis in abattoir workers was found to be 21.7%,  
207 which was higher compared to that observed in our study area [30]. This can be explained by  
208 the fact that both Pakistan and Iran depend on sheep and goat meat and milk for protein sources,  
209 which are likely to be contaminated with *B. melitensis*. In humans, *B. melitensis* is highly  
210 infectious compared to *B. abortus* [31], which is likely to be the problem in the study area.  
211 This practice followed in marketing and distribution of sheep and goat meat as well as milk  
212 products, in particular, makes the enforcement of hygienic measures very difficult [7].

### 213 **Risk factors associated with *Brucella* seropositivity**

214 The prevalence of human brucellosis in occupationally exposed individuals in the Mbeya  
215 region of Tanzania has been noted to vary with the occupational category, milk consumption  
216 behaviour, age and sex, although this was not statistically significant. The butcher men had a  
217 higher risk of exposure to brucellosis than shepherds and abattoir workers. This could be  
218 attributed to that fact that there is increased risk of injury (knife-cuts) among the butcher men  
219 compared to the other categories, thus increasing the exposure risk to the *Brucella* pathogen.  
220 High prevalence of brucellosis in males can be explained by the fact that most of activities in  
221 cattle value chain are carried out by males than females. Since majority of butchers are  
222 males who have high risk of acquiring brucellosis, it can be the reasons for the high prevalence  
223 of the disease. This is similar to findings by other studies [32, 33]. However, none of these  
224 have established the risk that shepherds have towards brucellosis in Tanzania despite the fact that  
225 they are at the starting point of the livestock value chain. Therefore, this is the first report in  
226 Tanzania to establish the risk that shepherds have towards brucellosis. These findings are in  
227 contrast to those by [20] who reported a high risk of exposure to brucellosis abattoir workers.  
228 The high disease prevalence among butcher men could be because they spend longer periods  
229 handling animal carcasses usually without protective wear and are more likely to be injured

230 when cutting meat and are in close contact with blood and tissues of infected animals. Hence  
231 they are at higher risk of infection than other groups. *Brucella* seropositivity was higher in  
232 males (1.41%) than females (0%), similar to findings by [11] in Nigeria but contrary to findings  
233 by [17] in Morogoro. Seroprevalence was higher in individuals below 20 years of age (2.25%).  
234 These findings agree with those by [34] in Uganda. This can be attributed to the traditional role  
235 that young men play in livestock management among the pastoral communities. The young  
236 males start rearing livestock at a young age and are in direct contact with animal and animal  
237 products during their daily livestock activities, which increases their risk of exposure to  
238 brucellosis. In our study, 75.3% of people consumed raw milk which is higher than that  
239 reported by [35]. This can be explained by the fact that over 70% of milk sales in Tanzania is  
240 produced by pastoral farmers who do not believe or know that milk could be a potential source  
241 of infection to humans; and are not ready to subject their milk to any form of [36]. Milk is a  
242 major vehicle for transmission of *Brucella* infection and individuals with a history of  
243 consumption of raw milk were more likely to be infected [34].

244

## 245 **Conclusion and Recommendations**

246 Our findings demonstrate the presence of human brucellosis in occupationally exposed  
247 individuals, specifically abattoir workers, butcher men and shepherds in the Mbeya region.  
248 Given that we applied random sampling strategy to obtain the sample size (from our earlier  
249 study), the study findings can be generalized to the region. The results from this study indicate  
250 that more work needs to be done to educate the occupationally exposed individuals on  
251 brucellosis and its associated risks. Therefore, there is need to create public awareness, design  
252 and implement control measures that will prevent further spread of the disease within and

253 outside the study area. We recommend regional and multi-sectoral collaboration, especially  
254 among veterinarians and medical professionals using the one health approach in order to  
255 combat the disease.

## 256 **Limitations encountered in this study**

257 Some of the limitations were that some shepherds from certain cattle herds that had been  
258 screened earlier could not be screened due to the migratory nature of agro-pastoralism in search  
259 of water and pasture.

## 260 **Acknowledgement**

261 The authors are grateful to Mr Joseph Ndebe, Ms Jessica Chitambo for assisting in laboratory  
262 work, Health Department of Mbarara, Momba and Mbeya District Councils for their assistance  
263 during the sampling.

## 264 **Author contributions**

265 **Conceptualization:** Frederick D. Sagamiko and John B. Muma

266 **Data curation:** Frederick D. Sagamiko

267 **Formal analysis:** Frederick D. Sagamiko, John B. Muma and Bernard M. Hang'ombe

268 **Funding acquisition:** INTRA-ACP Mobility Project

269 **Methodology:** Frederick D. Sagamiko

270 **Supervision:** John B. Muma, Bernard M. Hang'ombe, Alfred M. Mwanza.

271 **Validation:** Bernard M. Hang'ombe

272 **Visualization:** Frederick D. Sagamiko

273 **Writing – original draft:** Sagamiko FD, John B. Muma, Bernard M. Hang’ombe, Esron D.

274 Karimuribo, Alfred M. Mwanza, Ruth L. Mfunne, Calvin Sindato, Hugo Kavunga.

275 **Writing – review & editing:** John B. Muma, Bernard M. Hang’ombe, Esron D. Karimuribo,

276 Alfred M. Mwanza, Ruth L. Mfunne, Calvin Sindato, Hugo Kavunga.

277 **Conflict of Interest:** The authors declare no conflict of interest on the study.

## 278 **References**

- 279 1. OIE. Manual of Diagnostic Tests and Vaccines for Terrestrial Animals: (Mammals,  
280 Birds and Bees). Rev Sci Tech. 2012;819–1404.
- 281 2. Abubakar M, Mansoor M, Arshed MJ. Bovine brucellosis old and new concepts with  
282 Pakistan perspective. Pak Vet J. 2011;32(2):147-155.
- 283 3. Kunda J, Cleavant S, Fitspatri S, Nigel F, Kambarage D, Shirima G, et al. Brucellosis  
284 in Arusha and Manyara regions, Tanzania: A challenge to public health. Tanz Med J.  
285 2005;20(1):1-4.
- 286 4. Scholz HC, Revilla-Fernández S, Al Dahouk S, Hammerl JA, Zygmunt MS, Cloeckaert  
287 A, et al. *Brucella vulpis* sp. nov., isolated from mandibular lymph nodes of red foxes  
288 (*Vulpes vulpes*). Int J Syst Evol Microbiol. 2016;66(5):2090-8.
- 289 5. Seleem M, Boyle SM, Sriranganthan N. Brucellosis: a re-emerging zoonosis. Vet  
290 Microbiol. 2010;140:392-398.
- 291 6. Lucero NC, Corazza R, Almuzara MN, Reynes E, Escobar GI, Boeri E, et al. Human  
292 *Brucella canis* outbreak linked to infection in dogs. Epidem Infect. 2010;138(2): 280-  
293 285.

- 294 7. Corbel MJ. Brucellosis in humans and animals. World Health Organization; 2006.
- 295 8. Godfroid J. Brucellosis in livestock and wildlife: zoonotic diseases without pandemic  
296 potential in need of innovative one health approaches. Arch Public Health.  
297 2017;75(1):34.
- 298 9. Yumuk Z, O'callaghan D. Brucellosis in Turkey-an overview. Int J Infect Dis.  
299 2012;16:e 228-e235.
- 300 10. Magwedere K, Bishi A, Tjipura-Zaire G, Eberle G, Hemberger Y, Hoffman LC, et al.  
301 *Brucellae* through the food chain: the role of sheep, goats and springbok (*Antidorcus*  
302 *marsupialis*) as sources of human infections in Namibia. J S Afr Vet Assoc.  
303 2011;82(4):205-12.
- 304 11. Aworh MK, Okolocha E, Kwaga J, Fasina F, Lazarus D, Suleman I, et al. Human  
305 brucellosis: seroprevalence and associated exposure factors among abattoir workers in  
306 Abuja, Nigeria-2011. Pan Afr Med J. 2013(16)
- 307 12. Nizenyimana G, Mwiine FN. Comparative *Brucella abortus* antibody prevalence in  
308 cattle under contrasting husbandry practices in Uganda. J S Afr vet.Assoc. 2013;.84(1).
- 309 13. Ragasa G, Mekonnen D, Yamuah L, Tilahun H, Guta T, Gebreyohannes A, et al.  
310 Human brucellosis in Traditional pastoral communities in Ethiopia. Int J Trop.Med.  
311 2009;59-64.
- 312 14. Muma, J.B., Samui, K., Lund, A., Nielsen, K., Chimana, H., Chisenga C, et al.  
313 Brucellosis in rural communities in Zambia and factors associated with increased anti-  
314 *Brucella* spp. antibody presence. Z J Sci Tech. 2008;12 (2): 9-18
- 315 15. Assenga JA, Matemba LE, Muller SK, Malakalinga JJ, Kazwala RR. Epidemiology of  
316 *Brucella* infection in the human, livestock and wildlife interface in the Katavi-Rukwa  
317 ecosystem, Tanzania. BMC vet res. 2015;11(1), p.189.

- 318 16. John K, Fitzpatrick J, French N, Kazwala R, Kambarage D, Mfinanga GS, et al.  
319 Quantifying risk factors for human brucellosis in rural northern Tanzania. PloS one.  
320 2010;5(4):e9968.
- 321 17. James LW. Studies on human brucellosis in the Mikumi Selous Ecosystem, Morogoro,  
322 Tanzania. Doctoral dissertation, Sokoine University of Agriculture.2013.Accessed  
323 from[http://www.suaire.suanet.ac.tz:8080/xmlui/bitstream/handle/123456789/938/LAWRE](http://www.suaire.suanet.ac.tz:8080/xmlui/bitstream/handle/123456789/938/LAWRENCE%20WANKYO%20JAMES.pdf?sequence=1&isAllowed=y)  
324 [NCIA%20WANKYO%20JAMES.pdf?sequence=1&isAllowed=y](http://www.suaire.suanet.ac.tz:8080/xmlui/bitstream/handle/123456789/938/LAWRENCE%20WANKYO%20JAMES.pdf?sequence=1&isAllowed=y)
- 325 18. Bouley AJ, Biggs HM, Stoddard RA, Morrissey AB, Bartlett JA, Afwamba IA, et al.  
326 Brucellosis among hospitalized febrile patients in northern Tanzania. Am J Trop Med  
327 Hyg. 2012;87(6):1105-1111.
- 328 19. Mngumi EB, Mirambo MM, Wilson S, Mshana SE. Predictors of specific anti-*Brucella*  
329 antibodies among humans in agro-pastoral communities in Sengerema district,  
330 Mwanza, Tanzania: the need for public awareness. Trop Med Health. 2016;44: 34.
- 331 20. Mirambo MM, Mgode GF, Malima ZO, John M, Mngumi EB., Mhamphi GG. Et al..  
332 Seropositivity of *Brucella spp.* and *Leptospira spp.* antibodies among abattoir workers  
333 and meat vendors in the city of Mwanza, Tanzania: A call for one health approach  
334 control strategies. PLoS Negl Trop Dis. 2018;12(6):e0006600.
- 335 21. Carugati M, Biggs HM, Maze MJ, Stoddard RA, Cash-Goldwasser S, Hertz JT, et al.  
336 Incidence of human brucellosis in the Kilimanjaro Region of Tanzania in the periods  
337 2007–2008 and 2012–2014. Trans R Soc Trop Med and Hyg. 2018;112(3)136-143.
- 338 22. Sagamiko FD, Muma JB, Karimuribo ED, Mwanza AM, Sindato C, Hang'ombe BM.  
339 Sero-prevalence of Bovine Brucellosis and associated risk factors in Mbeya region,  
340 Southern highlands of Tanzania. Acta Trop. 2017;11:22 <https://doi.org/10.1016/j>.

- 341 23. NBS. Tanzania National Bureau of statistics. 2012. Available from: <http://nbs.go.tz>  
342 cited 10 February 2019.
- 343 24. Muma JB, Lund A, Nielsen K, Matope G, Munyeme M, Mwacalimba K, et al.  
344 Effectiveness of Rose Bengal test and fluorescence polarization assay in the diagnosis  
345 of *Brucella spp.* infections in free range cattle reared in endemic areas in Zambia. Trop  
346 Anim Health Prod. 2009 Jun 1;41(5):723-9.
- 347 25. Amegashie EA, Owusu-Dabo E, Salifu SP, Awuah AA, Baffour-Awuah S, Addofoh  
348 N, et al. Sero-prevalence and occupational risk factors for *Brucella* infection among  
349 slaughter house workers and butchers in Kumasi, Ghana. J Epidemiol Res. 2017;(3)1.
- 350 26. Zein AM. Seroprevalence of Brucellosis among high- risk occupational groups in  
351 Northern State, Sudan. Khartoum Med J. 2014;07(2):994-999.
- 352 27. Pradel G, Schilitzer M. Antibiotics in malaria therapy and their effect on the parasite  
353 epicoplast. Curr Mol Med. 2010;10(3):335-49.
- 354 28. Baheshti S, Rezaian GR, Azad F, Faghiri Z, Taheri F. Seroprevalence of Brucellosis  
355 and Risk Factors Related to High Risk Occupational Groups in Kazeroon, South of  
356 Iran. Int J Occup Environ Med. 2010;1(2):62-68.
- 357 29. Nikokar I, Hosseinpour M, Asmar M, Pirmohbatei S, Hakeimeh F, Razavei MT.  
358 Seroprevalence of Brucellosis among high risk individuals in Guilan, Iran. J Res Med  
359 Sci. 2011;16 (10):1366-1371.
- 360 30. Mukhtar F. Brucellosis in high risk occupational group: Seroprevalence and analysis of  
361 risk factors. J Pak Med Assoc. 2010;60:1031.
- 362 31. Pappas G, Papadimitriou P, Akritidis N, Christou L, Tsianos EV. The new global map  
363 of human brucellosis. Lancet Infect Dis. 2006 Feb 1;6(2):91-9.

- 364 32. Swai ES. Human Brucellosis: Seroprevalence and Risk Factors Related to High Risk  
365 Occupational Groups in Tanga Municipality, Tanzania. *Zoonoses Public Health*.  
366 2009;56(4):183-187.
- 367 33. Zein AM. Seroprevalence of Brucellosis among high-risk occupational groups in  
368 Northern State, Sudan. *Khartoum Med J*. 2014 Feb 28;7(2):994-9.
- 369 34. Tumwine G, Matovu E, Kabasa JD, Owiny DO, Majalija S. Human brucellosis: sero-  
370 prevalence and associated risk factors in agro-pastoral communities of Kiboga District,  
371 Central Uganda. *BMC Public Health*. 2015;15(1):900.
- 372 35. Staal SJ, Kaguongo WN. The Ugandan dairy subsector targeting development  
373 opportunities. Nairobi, Kenya: International Livestock Research Institute (ILRI).  
374 2003:30 pp.
- 375 36. Njombe AP, Msanga Y, Mbwambo N, Makembe N. The Tanzania dairy industry:  
376 Status, opportunities and prospects. In Ministry of Livestock and Fisheries  
377 Development. African Dairy Conference and Exhibition, Dar es Salaam, Tanzania.  
378 2011:22pp.

## 379 **Supporting Information**

380 **S1 Checklist. STROBE Checklist (DOC)**

381 **S2 Ethical Approval. Approval letter from Ministry of Health (MOH), Tanzania for**  
382 **collection of human blood samples (PDF)**

383 **S3 Dataset. Human dataset used for analysis (XLS)**

384
